# Supplementary material for: Prevalence of hepatitis B immunity and infection in home self-sampling HIV service users
Source: PubMed Central journal article supplement — Sex Transm Infect. 2021 Jun 30;98(4):286–92. doi: 10.1136/sextrans-2021-055071 (PMC9120376; doi:10.1136/sextrans-2021-055071), 2021-06-30
Supplement: sextrans-2021-055071supp001.pdf [file sextrans-2021-055071supp001.pdf]

Supplementary table 1: Additional risk factors reported by respondents who were neither MSM nor Black African

| Risk factor                         | N (% , 95% CI)         |
|-------------------------------------|------------------------|
| High risk partner                   | 364 (69.1%, 65.0-72.9) |
| Born in a higher prevalence country | 49 (9.3%, 7.1-12.1)    |
| Injecting drug use                  | 29 (5.5%, 3.9-7.8)     |
| Exchanged sex for money or drugs    | 146 (27.7%, 24.1-31.7) |
| At least one risk factor            | 476 (90.3%, 90.3-92.6) |
| Total                               | 527                    |
