# Supplementary material for: Prevalence of hepatitis B immunity and infection in home self-sampling HIV service users
Source: PubMed Central journal article supplement — Sex Transm Infect. 2021 Jun 30;98(4):286–92. doi: 10.1136/sextrans-2021-055071 (PMC9120376; doi:10.1136/sextrans-2021-055071), 2021-06-30
Supplement: sextrans-2021-055071supp002.pdf [file sextrans-2021-055071supp002.pdf]

Supplementary table 2: Detailed demographics and HBV infection status by sexual orientation

| Characteristic      | Demographics             |                          |                              | Infection                      |                                   |                           |                             |       |                                |                                   |                           |                             |       |
|---------------------|--------------------------|--------------------------|------------------------------|--------------------------------|-----------------------------------|---------------------------|-----------------------------|-------|--------------------------------|-----------------------------------|---------------------------|-----------------------------|-------|
|                     |                          |                          |                              | MSM                            |                                   |                           |                             |       | Heterosexual                   |                                   |                           |                             |       |
|                     | Overall No. (%; 95% CI)  | MSM No. (%; 95% CI)      | Heterosexual No. (%; 95% CI) | Past infection no. (%; 95% CI) | Current infection no. (%; 95% CI) | Immunised no. (%; 95% CI) | Susceptible no. (%; 95% CI) | Total | Past infection no. (%; 95% CI) | Current infection no. (%; 95% CI) | Immunised no. (%; 95% CI) | Susceptible no. (%; 95% CI) | Total |
| <b>Total</b>        | 2172                     | 1497                     | 657                          | 56; (3.7%, 2.9-4.8)            | 3; (0.2%, 0.1-0.6)                | 448; (29.9%, 27.7-32.3)   | 990; (66.1%, 63.7-68.5)     | 1497  | 30; (4.6%, 3.2-6.4)            | 7; (1.1%, 0.5-2.2)                | 114; (17.4%, 14.6-20.4)   | 506; (77.0%, 73.6-80.1)     | 657   |
| <b>Age</b>          |                          |                          |                              |                                |                                   |                           |                             |       |                                |                                   |                           |                             |       |
| 16-25               | 961; (44.2%, 42.2-46.3)  | 636; (42.5%, 40.0-45.0)  | 315; (47.9%, 44.1-51.8)      | 6; (0.9%, 0.4-2.0)             | 1; (0.2%, 0.0-0.9)                | 168; (26.4%, 23.1-30.0)   | 461; (72.5%, 68.9-75.8)     | 636   | 5; (1.6%, 0.7-3.7)             | 2; (0.6%, 0.2-2.3)                | 43; (13.7%, 10.3-17.9)    | 265; (84.1%, 79.7-87.7)     | 315   |
| 26-35               | 773; (35.6%, 33.6-37.6)  | 561; (37.5%, 35.1-40.0)  | 206; (31.4%, 27.9-35.0)      | 19; (3.4%, 2.2-5.2)            | 2; (0.4%, 0.1-1.3)                | 186; (33.2%, 29.4-37.2)   | 354; (63.1%, 59.0-67.0)     | 561   | 11; (5.3%, 3.0-9.3)            | 1; (0.5%, 0.1-2.7)                | 50; (24.3%, 18.9-30.6)    | 144; (69.9%, 63.3-75.8)     | 206   |
| 36-45               | 292; (13.4%, 12.1-14.9)  | 198; (13.2%, 11.6-15.0)  | 92; (14.0%, 11.6-16.9)       | 16; (8.1%, 5.0-12.7)           | 0; (0.0%, 0.0-1.9)                | 65; (32.8%, 26.7-39.6)    | 117; (59.1%, 52.1-65.7)     | 198   | 12; (13.0%, 7.6-21.4)          | 4; (4.3%, 1.7-10.7)               | 12; (13.0%, 7.6-21.4)     | 64; (69.6%, 59.5-78.0)      | 92    |
| 46-55               | 104; (4.8%, 4.0-5.8)     | 66; (4.4%, 3.5-5.6)      | 38; (5.8%, 4.2-7.8)          | 6; (9.1%, 4.2-18.4)            | 0; (0.0%, 0.0-5.5)                | 20; (30.3%, 20.6-42.2)    | 40; (60.6%, 48.5-71.5)      | 66    | 2; (5.3%, 1.5-17.3)            | 0; (0.0%, 0.0-9.2)                | 8; (21.1%, 11.1-36.3)     | 28; (73.7%, 58.0-85.0)      | 38    |
| 56-65               | 33; (1.5%, 1.1-2.1)      | 30; (2.0%, 1.4-2.8)      | 3; (0.5%, 0.2-1.3)           | 9; (30.0%, 16.7-47.9)          | 0; (0.0%, 0.0-11.4)               | 6; (20.0%, 9.5-37.3)      | 15; (50.0%, 33.2-66.8)      | 30    | 0; (0.0%, 0.0-56.1)            | 0; (0.0%, 0.0-56.1)               | 1; (33.3%, 6.1-79.2)      | 2; (66.7%, 20.8-93.9)       | 3     |
| 66-75               | 9; (0.4%, 0.2-0.8)       | 6; (0.4%, 0.2-0.9)       | 3; (0.5%, 0.2-1.3)           | 0; (0.0%, 0.0-39.0)            | 0; (0.0%, 0.0-39.0)               | 3; (50.0%, 18.8-81.2)     | 3; (50.0%, 18.8-81.2)       | 6     | 0; (0.0%, 0.0-56.1)            | 0; (0.0%, 0.0-56.1)               | 0; (0.0%, 0.0-56.1)       | 3; (100.0%, 43.9-100.0)     | 3     |
| <b>Ethnicity</b>    |                          |                          |                              |                                |                                   |                           |                             |       |                                |                                   |                           |                             |       |
| White British/Irish | 1478; (68.0%, 66.1-70.0) | 1149; (76.8%, 74.5-78.8) | 315; (47.9%, 44.1-51.8)      | 37; (3.2%, 2.3-4.4)            | 1; (0.1%, 0.0-0.5)                | 326; (28.4%, 25.8-31.0)   | 785; (68.3%, 65.6-70.9)     | 1149  | 5; (1.6%, 0.7-3.7)             | 1; (0.3%, 0.1-1.8)                | 44; (14.0%, 10.6-18.2)    | 265; (84.1%, 79.7-87.7)     | 315   |

|                                          |                          |                         |                         |                      |                     |                         |                         |     |                       |                     |                        |                         |     |
|------------------------------------------|--------------------------|-------------------------|-------------------------|----------------------|---------------------|-------------------------|-------------------------|-----|-----------------------|---------------------|------------------------|-------------------------|-----|
| Black African                            | 153; (7.0%, 6.0-8.2)     | 12; (0.8%, 0.5-1.4)     | 140; (21.3%, 18.3-24.6) | 3; (25.0%, 8.9-53.2) | 0; (0.0%, 0.0-24.2) | 4; (33.3%, 13.8-60.9)   | 5; (41.7%, 19.3-68.0)   | 12  | 19; (13.6%, 8.9-20.2) | 5; (3.6%, 1.5-8.1)  | 20; (14.3%, 9.4-21.0)  | 96; (68.6%, 60.5-75.7)  | 140 |
| Black other                              | 48; (2.2%, 1.7-2.9)      | 24; (1.6%, 1.1-2.4)     | 23; (3.5%, 2.3-5.2)     | 1; (4.2%, 0.7-20.2)  | 0; (0.0%, 0.0-13.8) | 6; (25.0%, 12.0-44.9)   | 17; (70.8%, 50.8-85.1)  | 24  | 1; (4.3%, 0.8-21.0)   | 0; (0.0%, 0.0-14.3) | 7; (30.4%, 15.6-50.9)  | 15; (65.2%, 44.9-81.2)  | 23  |
| Other                                    | 124; (5.7%, 4.8-6.8)     | 64; (4.3%, 3.4-5.4)     | 58; (8.8%, 6.9-11.2)    | 2; (3.1%, 0.9-10.7)  | 0; (0.0%, 0.0-5.7)  | 29; (45.3%, 33.7-57.4)  | 33; (51.6%, 39.6-63.4)  | 64  | 2; (3.4%, 1.0-11.7)   | 0; (0.0%, 0.0-6.2)  | 9; (15.5%, 8.4-26.9)   | 47; (81.0%, 69.1-89.1)  | 58  |
| Other White Background                   | 260; (12.0%, 10.7-13.4)  | 187; (12.5%, 10.9-14.3) | 73; (11.1%, 8.9-13.7)   | 10; (5.3%, 2.9-9.6)  | 1; (0.5%, 0.1-3.0)  | 63; (33.7%, 27.3-40.7)  | 113; (60.4%, 53.3-67.2) | 187 | 2; (2.7%, 0.8-9.5)    | 1; (1.4%, 0.2-7.4)  | 26; (35.6%, 25.6-47.1) | 44; (60.3%, 48.8-70.7)  | 73  |
| South Asian                              | 58; (2.7%, 2.1-3.4)      | 23; (1.5%, 1.0-2.3)     | 35; (5.3%, 3.9-7.3)     | 0; (0.0%, 0.0-14.3)  | 0; (0.0%, 0.0-14.3) | 9; (39.1%, 22.2-59.2)   | 14; (60.9%, 40.8-77.8)  | 23  | 0; (0.0%, 0.0-9.9)    | 0; (0.0%, 0.0-9.9)  | 5; (14.3%, 6.3-29.4)   | 30; (85.7%, 70.6-93.7)  | 35  |
| Other Asian background                   | 51; (2.3%, 1.8-3.1)      | 38; (2.5%, 1.9-3.5)     | 13; (2.0%, 1.2-3.4)     | 3; (7.9%, 2.7-20.8)  | 1; (2.6%, 0.5-13.5) | 11; (28.9%, 17.0-44.8)  | 23; (60.5%, 44.7-74.4)  | 38  | 1; (7.7%, 1.4-33.3)   | 0; (0.0%, 0.0-22.8) | 3; (23.1%, 8.2-50.3)   | 9; (69.2%, 42.4-87.3)   | 13  |
| <b>New partners in last 12 months</b>    |                          |                         |                         |                      |                     |                         |                         |     |                       |                     |                        |                         |     |
| No new partners                          | 79; (3.6%, 2.9-4.5)      | 35; (2.3%, 1.7-3.2)     | 41; (6.2%, 4.6-8.4)     | 1; (2.9%, 0.5-14.5)  | 0; (0.0%, 0.0-9.9)  | 9; (25.7%, 14.2-42.1)   | 25; (71.4%, 54.9-83.7)  | 35  | 1; (2.4%, 0.4-12.6)   | 0; (0.0%, 0.0-8.6)  | 13; (31.7%, 19.6-47.0) | 27; (65.9%, 50.5-78.4)  | 41  |
| Just 1 partner                           | 481; (22.1%, 20.4-23.9)  | 269; (18.0%, 16.1-20.0) | 208; (31.7%, 28.2-35.3) | 7; (2.6%, 1.3-5.3)   | 1; (0.4%, 0.1-2.1)  | 65; (24.2%, 19.4-29.6)  | 196; (72.9%, 67.3-77.8) | 269 | 14; (6.7%, 4.1-11.0)  | 3; (1.4%, 0.5-4.2)  | 30; (14.4%, 10.3-19.8) | 161; (77.4%, 71.3-82.6) | 208 |
| 2-5 partners                             | 1122; (51.7%, 49.6-53.8) | 769; (51.4%, 48.8-53.9) | 346; (52.7%, 48.8-56.5) | 25; (3.3%, 2.2-4.8)  | 1; (0.1%, 0.0-0.7)  | 209; (27.2%, 24.2-30.4) | 534; (69.4%, 66.1-72.6) | 769 | 13; (3.8%, 2.2-6.3)   | 3; (0.9%, 0.3-2.5)  | 60; (17.3%, 13.7-21.7) | 270; (78.0%, 73.4-82.1) | 346 |
| 6-12 partners                            | 319; (14.7%, 13.3-16.2)  | 273; (18.2%, 16.4-20.3) | 43; (6.5%, 4.9-8.7)     | 12; (4.4%, 2.5-7.5)  | 1; (0.4%, 0.1-2.0)  | 95; (34.8%, 29.4-40.6)  | 165; (60.4%, 54.5-66.1) | 273 | 1; (2.3%, 0.4-12.1)   | 1; (2.3%, 0.4-12.1) | 6; (14.0%, 6.6-27.3)   | 35; (81.4%, 67.4-90.3)  | 43  |
| More than 12 partners                    | 171; (7.9%, 6.8-9.1)     | 151; (10.1%, 8.7-11.7)  | 19; (2.9%, 1.9-4.5)     | 11; (7.3%, 4.1-12.6) | 0; (0.0%, 0.0-2.5)  | 70; (46.4%, 38.6-54.3)  | 70; (46.4%, 38.6-54.3)  | 151 | 1; (5.3%, 0.9-24.6)   | 0; (0.0%, 0.0-16.8) | 5; (26.3%, 11.8-48.8)  | 13; (68.4%, 46.0-84.6)  | 19  |
| <b>Unprotected sex in last 12 months</b> |                          |                         |                         |                      |                     |                         |                         |     |                       |                     |                        |                         |     |

|                                                    |                                |                               |                            |                           |                        |                               |                               |     |                            |                        |                           |                               |     |
|----------------------------------------------------|--------------------------------|-------------------------------|----------------------------|---------------------------|------------------------|-------------------------------|-------------------------------|-----|----------------------------|------------------------|---------------------------|-------------------------------|-----|
| No                                                 | 317; (14.6%,<br>13.2-16.1)     | 248;<br>(16.6%,<br>14.8-18.5) | 65; (9.9%,<br>7.8-12.4)    | 7; (2.8%,<br>1.4-5.7)     | 0; (0.0%,<br>0.0-1.5)  | 73; (29.4%,<br>24.1-35.4)     | 168;<br>(67.7%,<br>61.7-73.3) | 248 | 3; (4.6%,<br>1.6-12.7)     | 0; (0.0%,<br>0.0-5.6)  | 13; (20.0%,<br>12.1-31.3) | 49; (75.4%,<br>63.7-84.2)     | 65  |
| Yes, with 1 partner                                | 908; (41.8%,<br>39.7-43.9)     | 621;<br>(41.5%,<br>39.0-44.0) | 281; (42.8%,<br>39.0-46.6) | 22;<br>(3.5%,<br>2.4-5.3) | 1; (0.2%,<br>0.0-0.9)  | 184;<br>(29.6%,<br>26.2-33.3) | 414;<br>(66.7%,<br>62.9-70.3) | 621 | 17;<br>(6.0%,<br>3.8-9.5)  | 4; (1.4%,<br>0.6-3.6)  | 48; (17.1%,<br>13.1-21.9) | 212;<br>(75.4%,<br>70.1-80.1) | 281 |
| Yes, with 2-5 partners                             | 823; (37.9%,<br>35.9-40.0)     | 543;<br>(36.3%,<br>33.9-38.7) | 276; (42.0%,<br>38.3-45.8) | 21;<br>(3.9%,<br>2.5-5.8) | 1; (0.2%,<br>0.0-1.0)  | 161;<br>(29.7%,<br>26.0-33.6) | 360;<br>(66.3%,<br>62.2-70.1) | 543 | 8; (2.9%,<br>1.5-5.6)      | 3; (1.1%,<br>0.4-3.1)  | 48; (17.4%,<br>13.4-22.3) | 217;<br>(78.6%,<br>73.4-83.0) | 276 |
| Yes, with 6-12 partners                            | 79; (3.6%,<br>2.9-4.5)         | 49; (3.3%,<br>2.5-4.3)        | 27; (4.1%,<br>2.8-5.9)     | 3; (6.1%,<br>2.1-16.5)    | 1; (2.0%,<br>0.4-10.7) | 15; (30.6%,<br>19.5-44.5)     | 30;<br>(61.2%,<br>47.2-73.6)  | 49  | 1; (3.7%,<br>0.7-18.3)     | 0; (0.0%,<br>0.0-12.5) | 2; (7.4%,<br>2.1-23.4)    | 24; (88.9%,<br>71.9-96.1)     | 27  |
| Yes, with more than 12 partners                    | 45; (2.1%,<br>1.6-2.8)         | 36; (2.4%,<br>1.7-3.3)        | 8; (1.2%,<br>0.6-2.4)      | 3; (8.3%,<br>2.9-21.8)    | 0; (0.0%,<br>0.0-9.6)  | 15; (41.7%,<br>27.1-57.8)     | 18;<br>(50.0%,<br>34.5-65.5)  | 36  | 1;<br>(12.5%,<br>2.2-47.1) | 0; (0.0%,<br>0.0-32.4) | 3; (37.5%,<br>13.7-69.4)  | 4; (50.0%,<br>21.5-78.5)      | 8   |
| <b>Last HIV test</b>                               |                                |                               |                            |                           |                        |                               |                               |     |                            |                        |                           |                               |     |
| Never tested                                       | 577; (26.6%,<br>24.8-28.5)     | 274;<br>(18.3%,<br>16.4-20.3) | 291; (44.3%,<br>40.5-48.1) | 2; (0.7%,<br>0.2-2.6)     | 2; (0.7%,<br>0.2-2.6)  | 35; (12.8%,<br>9.3-17.2)      | 235;<br>(85.8%,<br>81.1-89.4) | 274 | 7; (2.4%,<br>1.2-4.9)      | 3; (1.0%,<br>0.4-3.0)  | 42; (14.4%,<br>10.9-18.9) | 239;<br>(82.1%,<br>77.3-86.1) | 291 |
| Within the last year                               | 1004;<br>(46.2%,<br>44.1-48.3) | 832;<br>(55.6%,<br>53.0-58.1) | 170; (25.9%,<br>22.7-29.4) | 33;<br>(4.0%,<br>2.8-5.5) | 1; (0.1%,<br>0.0-0.7)  | 301;<br>(36.2%,<br>33.0-39.5) | 497;<br>(59.7%,<br>56.4-63.0) | 832 | 10;<br>(5.9%,<br>3.2-10.5) | 2; (1.2%,<br>0.3-4.2)  | 32; (18.8%,<br>13.7-25.4) | 126;<br>(74.1%,<br>67.1-80.1) | 170 |
| Over 1 year ago                                    | 591; (27.2%,<br>25.4-29.1)     | 391;<br>(26.1%,<br>24.0-28.4) | 196; (29.8%,<br>26.5-33.4) | 21;<br>(5.4%,<br>3.5-8.1) | 0; (0.0%,<br>0.0-1.0)  | 112;<br>(28.6%,<br>24.4-33.3) | 258;<br>(66.0%,<br>61.2-70.5) | 391 | 13;<br>(6.6%,<br>3.9-11.0) | 2; (1.0%,<br>0.3-3.6)  | 40; (20.4%,<br>15.4-26.6) | 141;<br>(71.9%,<br>65.3-77.8) | 196 |
| <b>Sex under the influence of alcohol or drugs</b> |                                |                               |                            |                           |                        |                               |                               |     |                            |                        |                           |                               |     |
| Never                                              | 812; (37.4%,<br>35.4-39.4)     | 579;<br>(38.7%,<br>36.2-41.2) | 230; (35.0%,<br>31.5-38.7) | 25;<br>(4.3%,<br>2.9-6.3) | 1; (0.2%,<br>0.0-1.0)  | 161;<br>(27.8%,<br>24.3-31.6) | 392;<br>(67.7%,<br>63.8-71.4) | 579 | 18;<br>(7.8%,<br>5.0-12.0) | 3; (1.3%,<br>0.4-3.8)  | 44; (19.1%,<br>14.6-24.7) | 165;<br>(71.7%,<br>65.6-77.2) | 230 |
| Sometimes                                          | 1114;<br>(51.3%,<br>49.2-53.4) | 766;<br>(51.2%,<br>48.6-53.7) | 341; (51.9%,<br>48.1-55.7) | 24;<br>(3.1%,<br>2.1-4.6) | 1; (0.1%,<br>0.0-0.7)  | 241;<br>(31.5%,<br>28.3-34.8) | 500;<br>(65.3%,<br>61.8-68.6) | 766 | 9; (2.6%,<br>1.4-4.9)      | 3; (0.9%,<br>0.3-2.6)  | 57; (16.7%,<br>13.1-21.0) | 272;<br>(79.8%,<br>75.2-83.7) | 341 |
| Usually                                            | 213; (9.8%,<br>8.6-11.1)       | 134;<br>(9.0%,<br>7.6-10.5)   | 74; (11.3%,<br>9.1-13.9)   | 6; (4.5%,<br>2.1-9.4)     | 1; (0.7%,<br>0.1-4.1)  | 41; (30.6%,<br>23.4-38.8)     | 86;<br>(64.2%,<br>55.8-71.8)  | 134 | 3; (4.1%,<br>1.4-11.3)     | 1; (1.4%,<br>0.2-7.3)  | 11; (14.9%,<br>8.5-24.7)  | 59; (79.7%,<br>69.2-87.3)     | 74  |

|        |                        |                        |                        |                        |                        |                          |                              |    |                        |                        |                         |                           |    |
|--------|------------------------|------------------------|------------------------|------------------------|------------------------|--------------------------|------------------------------|----|------------------------|------------------------|-------------------------|---------------------------|----|
| Always | 33; (1.5%,<br>1.1-2.1) | 18; (1.2%,<br>0.8-1.9) | 12; (1.8%,<br>1.0-3.2) | 1; (5.6%,<br>1.0-25.8) | 0; (0.0%,<br>0.0-17.6) | 5; (27.8%,<br>12.5-50.9) | 12;<br>(66.7%,<br>43.7-83.7) | 18 | 0; (0.0%,<br>0.0-24.2) | 0; (0.0%,<br>0.0-24.2) | 2; (16.7%,<br>4.7-44.8) | 10; (83.3%,<br>55.2-95.3) | 12 |
|--------|------------------------|------------------------|------------------------|------------------------|------------------------|--------------------------|------------------------------|----|------------------------|------------------------|-------------------------|---------------------------|----|
